# Supplementary material for: Colorimetric tracking of protein structural evolution based on the distance-dependent light scattering of embedded gold nanoparticles
Source: Royal Society of Chemistry journal article supplement (doi:10.1039/c2cc17174k), 2011-12-09
Supplement: c2cc17174k.pdf [file c2cc17174k.pdf]

## Electronic Supporting Information:

### In-situ colorimetric tracking of protein structural evolution based on the distance-dependent light scattering of embedded gold nanoparticles

Inhee Choi,<sup>a</sup> Young In Yang,<sup>a</sup> Eunhye Jeong,<sup>b</sup> Surin Hong,<sup>a</sup> Jung-Joon Sung,<sup>c</sup> Ji-Sook Hahn,<sup>a</sup>  
Taewook Kang,<sup>\*b</sup> and Jongheop Yi<sup>\*a</sup>

<sup>a</sup>*School of Chemical and Biological Engineering, Institute of Chemical Processes, Seoul National University, San 56-1, Seoul, 151-742, Korea*

<sup>b</sup>*Department of Chemical and Biomolecular Engineering, Sogang University, Seoul, 121-742, Korea.*

<sup>c</sup>*Department of Neurology, Seoul National University Hospital, Seoul 100-744, Korea.*

\*To whom correspondence should be addressed: [jyi@snu.ac.kr](mailto:jyi@snu.ac.kr)

Fax: +82 2-880-7438; Tel: +82 2-880-6670 and [twkang@sogang.ac.kr](mailto:twkang@sogang.ac.kr); Tel: +82 2-705-8920

#### Contents

- **Supplementary Methods**
- **Supplementary Figs S1-S6**

## Supplementary Methods

### 1. SOD1 purification.

Human SOD1 genes encoding the wild type were cloned into the pET23b(+) (Novagen) vector and the proteins were expressed in *E. coli* BL21(DE3)pLysS.<sup>1</sup> Cultures were induced by treatment with 0.5 mM isopropyl b-D-thiogalactopyranoside for 3 to 6 h at 30 °C, and the cells were lysed by sonication in a buffer containing 150 mM NaCl, 50 mM Tris-HCl (pH 8.0), 0.1 mM EDTA, 1 mM dithiothreitol (DTT), and 1 mM phenylmethylsulfonyl fluoride (PMSF). Solid (NH<sub>4</sub>)<sub>2</sub>SO<sub>4</sub> was added to the cell extracts to ~ 50 % saturation (0.313 g/ml), and after centrifugation, the supernatant proteins were loaded on a phenyl-sepharose 6 Fast Flow high sub hydrophobic column (Amersham Biosciences). Proteins were eluted with a linear gradient of ammonium sulfate (0.75 - 0 M) in 50 mM sodium phosphate (pH 7.0), 150 mM NaCl, 0.1 mM EDTA and 0.25 mM DTT. Wild type SOD1 was released with a high specificity from the column between 1.3 and 0.8 M ammonium sulfate.

### 2. Preparation of Au nanoparticles (GNPs).

Colloidal Au nanoparticles (20-nm diameters) were prepared by the reduction of HAuCl<sub>4</sub>·3H<sub>2</sub>O with citrate as previously described.<sup>2</sup> Optical spectra were recorded using a Hewlett-Packard 8453 spectrophotometer. Aqueous suspensions of the particles render the color of the suspension red.

### 3. Preparation of SOD1/GNP conjugate

The SOD1 monomer contains four cysteine residues, at positions 6, 57, 111, and 146 of which residues 57 and 146 form a disulfide linkage in the native state. Because SOD1 contains the free cysteine residues, this feature can be utilized to self-assemble SOD1 onto the GNP (via a gold-thiol conjugation technique). We initially prepared different samples of varying ratios between the SOD1 solution (0.1 mg/mL) and the synthesized GNP solution, ranging from 100:1 to 1:100 by volume. The optimum ratio determined for the GNP in this study is 1:30, and nanoparticles coated at this ratio were used in all experiments.

## Supplementary Figures

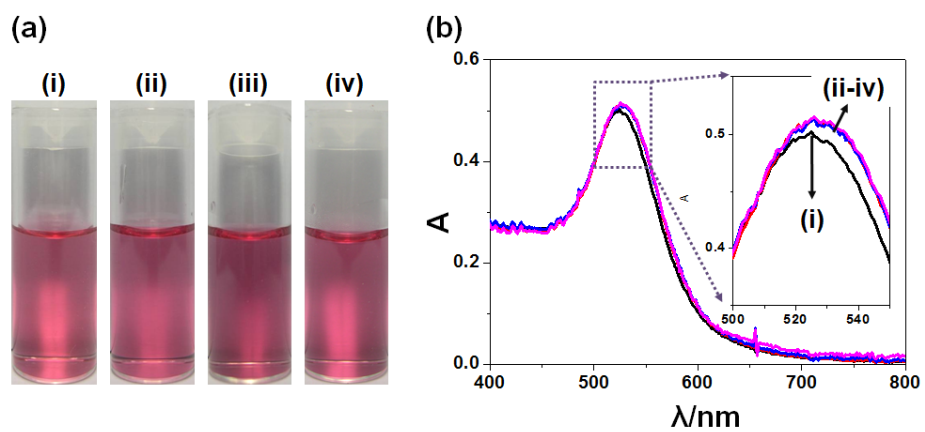

**Fig. S1.** Stability of the SOD1-GNP mixture solution. (a) and (b) Colors and spectra of the mixture solution at each step. (i) Bare GNP solution, (ii)-(iv) 0 hr, 2 hr, and 24 hr after SOD1 addition to the GNP solution.

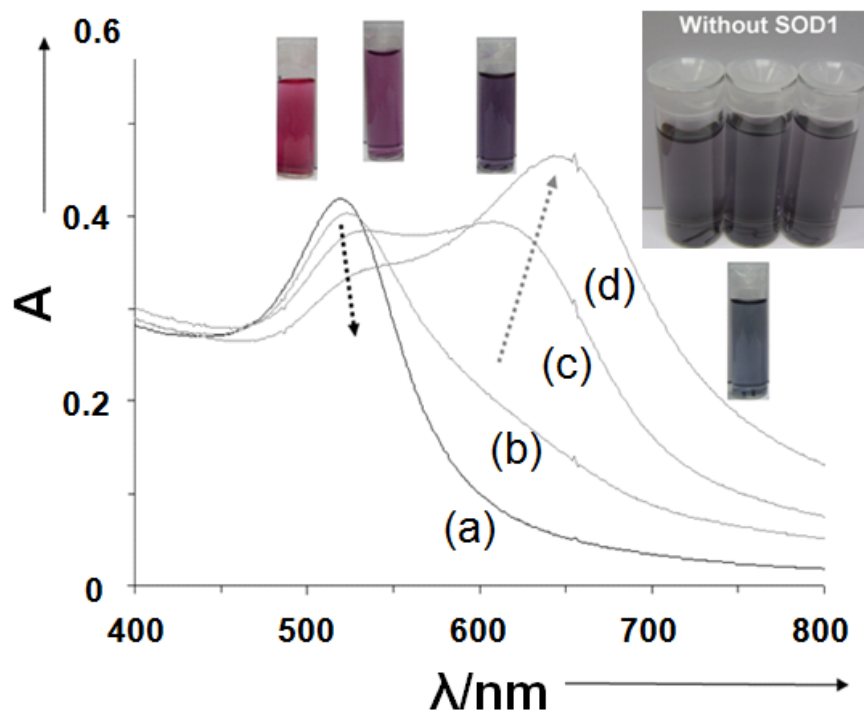

**Fig. S2.** Representative colorimetric response and corresponding spectral traces from the solutions consisting of free SOD1 and SOD1/GNP conjugates: (a) “As-made” and (b)-(d) “Under aggregation-promoting conditions” with increasing amounts of  $\text{Cu}^{2+}$  at constant  $\text{H}_2\text{O}_2$ .  $\text{Cu}^{2+}$  concentrations in samples (b)-(d) are 12.5, 25, and 50  $\mu\text{M}$ , respectively. Inset: Color changes (control experiments) observed upon exposing bare GNP solutions to  $\text{Cu}^{2+}$  ions (the concentrations of  $\text{Cu}^{2+}$  in vials from left to right correspond to that of (b)-(d)).

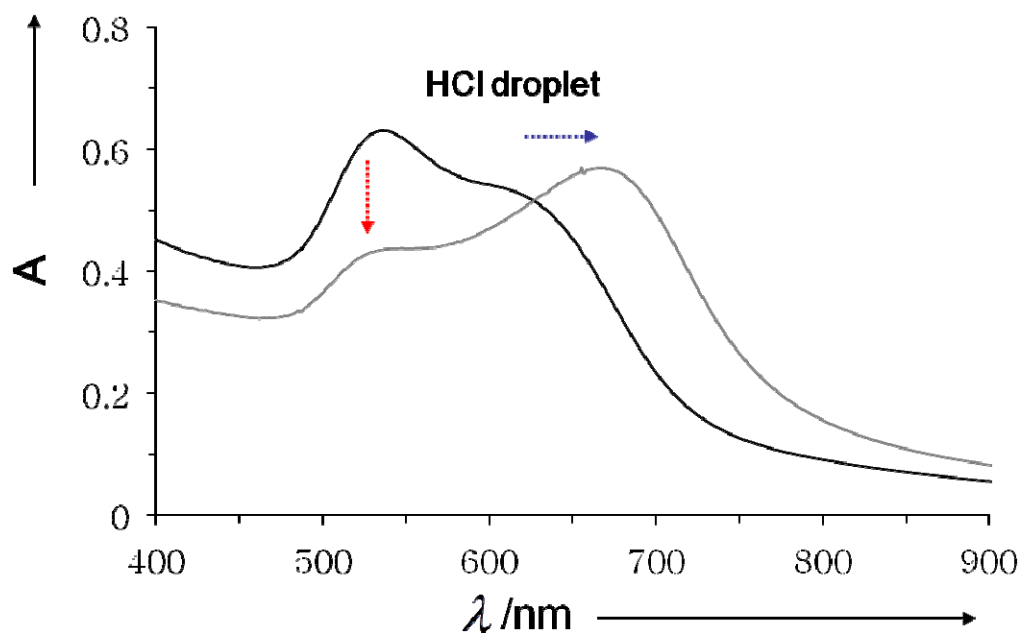

**Fig. S3.** UV-vis spectra of the SOD1-GNP solution after exposure with  $30 \mu\text{M Cu}^{2+}$  (black solid line) and after adding  $20 \mu\text{L}$  of  $1 \text{ M HCl}$  (gray solid line).

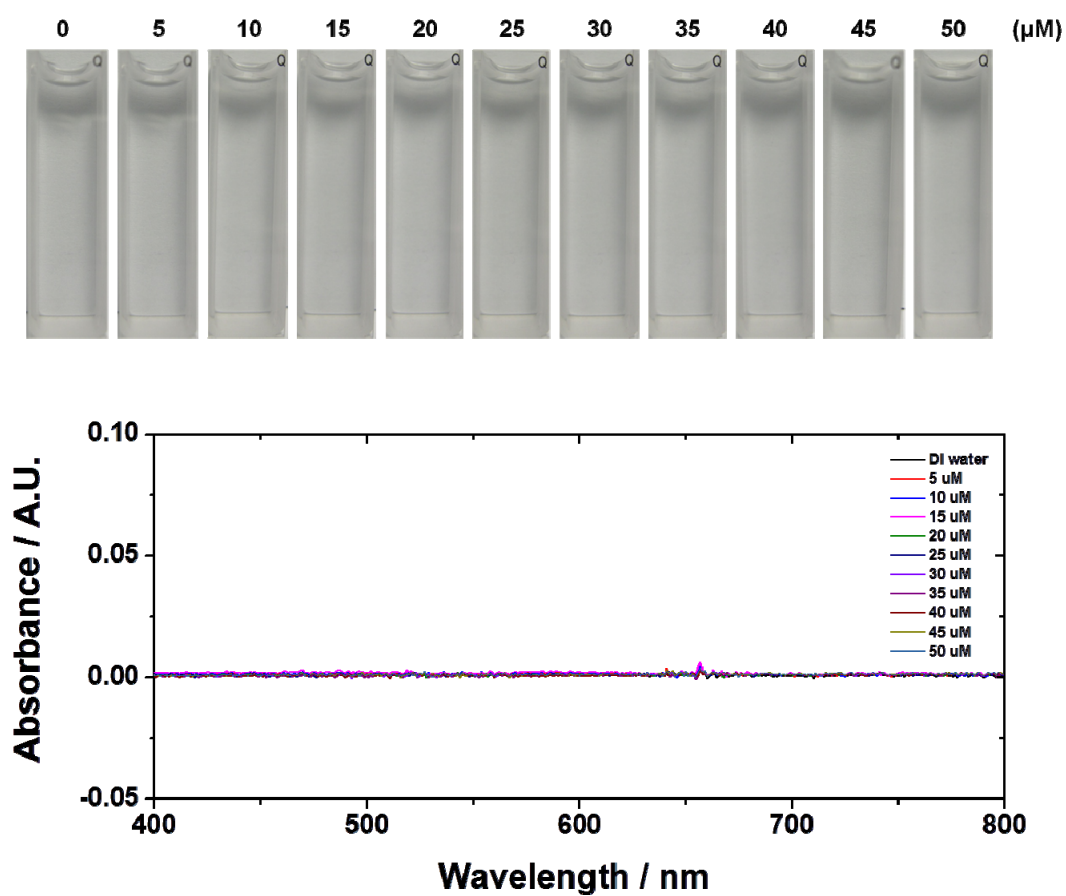

**Fig. S4.** Control experiments showing the  $\text{Cu}^{2+}$  ion solutions induce no significant color change in the concentration range (0-50  $\mu\text{M}$ ), where we investigated the protein aggregation.: Top: the color of D.I. water during the addition of  $\text{Cu}^{2+}$  ion solution (which is the exact same amount/concentration as Fig. 3), reading from left to right, are 0, 5, 10, 15, 20, 25, 30, 35, 40, 45, and 50  $\mu\text{M}$ . Bottom: Corresponding UV-Visible spectra.

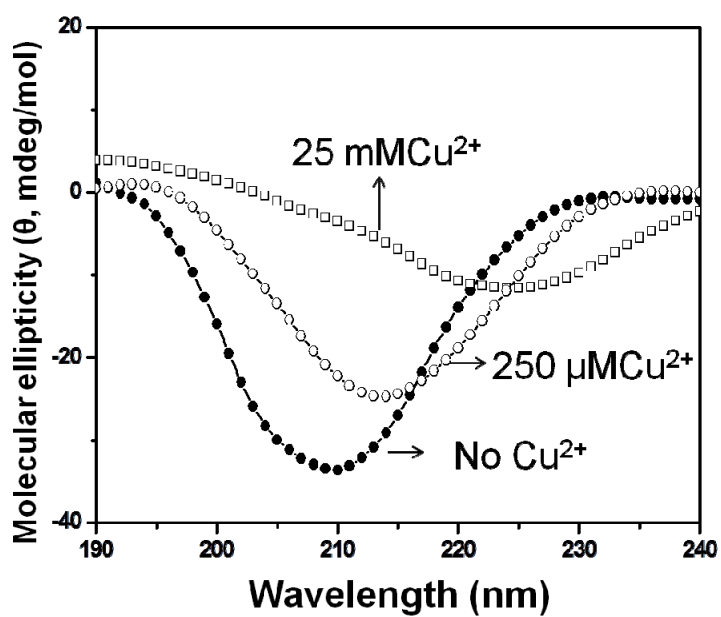

**Fig. S5.** Circular dichroism (CD) spectra of the structural evolution  $\text{Cu}^{2+}$  induced SOD1 aggregation.; It was not until 250  $\mu\text{M}$   $\text{Cu}^{2+}$  concentration (where is at least 50 times higher than what we used in the experiment) that we observed the changes in the CD spectra.

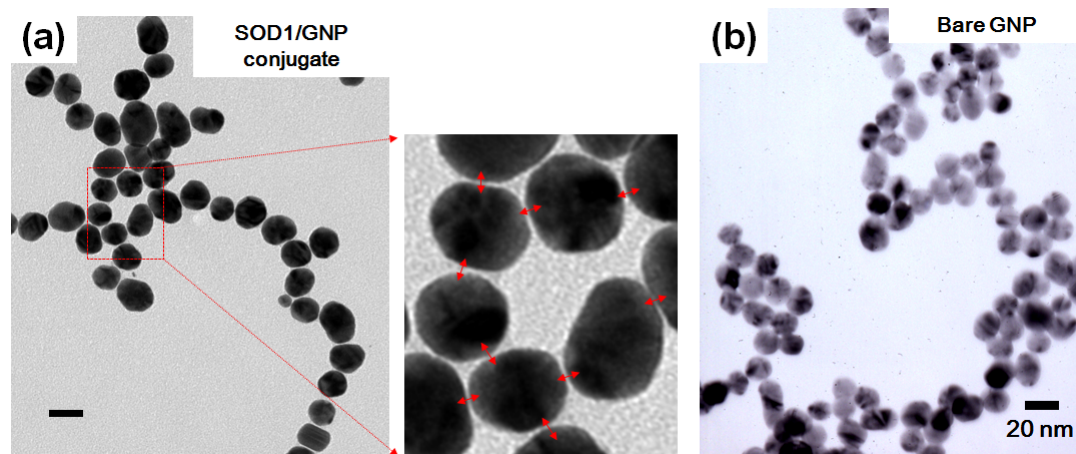

**Fig. S6.** (a) TEM image of a SOD1/GNP from the SOD1-GNP mixture solution before exposure to the denaturant. Although the GNPs were gathered by drying procedure during the TEM sample preparation, inset clearly shows the nano-sized gap observed between individual nanoparticle, which is due to the conjugation of SOD1 to the GNP. (b) TEM image of the bare GNP (without SOD1) solution after exposure with  $50 \mu\text{M}$  of  $\text{Cu}^{2+}$  and  $5 \mu\text{M}$  of  $\text{H}_2\text{O}_2$ .

## References

1. Boissinot, M.; Karnas, S.; Lepock, J. R.; Cabelli, D. E.; Tainer, J. A.; Getzoff, E. D.; Hallewell, R. A. *EMBO J.* **1997**, *16*, 2171.
2. (a) Handley, D. A. Methods for Synthesis of Colloidal Gold. *In Colloidal Gold: Principles, Methods and Applications*; Hayat, M. A., Ed.; Academic Press: San Diego, 1989. (b) Chah, S.; Fendler, J. H.; Yi, J. *J. Colloid Interface Sci.* **2002**, *250*, 142.
